# Supplementary material for: Extranodal extension of nodal metastases is a poor prognostic moderator in non-small cell lung cancer: a meta-analysis
Source: Springer Nature journal article supplement (doi:10.1007/s00428-018-2309-1), 2018-02-01
Supplement: MOESM1 [file 15432540]

**Supplementary Table 1.** Characteristics of the studies taking into account only N+ patients.

|  |  |  | ENE+ | | | | | ENE- | | | | |  | |  | | |  |  | |
| --- | --- | --- | --- | --- | --- | --- | --- | --- | --- | --- | --- | --- | --- | --- | --- | --- | --- | --- | --- | --- |
| Study  Author, Year (Country) | Exclusion  criteria | Specific Lymph Node Station | Number of participants | N. of females  (%) | Mean Age ± SD | Tumor Stage | Histotypes among NSCLC* | Number of participants | N. of females  (%) | Mean Age ± SD | Tumor Stage | Histotypes among NSCLC* | ENE definition** | Mean  Follow-up period  (months) | | eNOS | Number of adjustments  (type) | | |
| **Bergh, 1965**  **(Sweden)** | Intraoperative death | NS | 47 | NA | NA | NA | NA | 35 | NA | NA | NA | NA | 1 | >60 | | 6 | 0 | | |
| **Bollen, 1994 (The Netherlands)** | Distant metastases, non-radical resection, no mediastinal dissection | MLN | 8 | NA | NA | NA | NA | 10 | NA | NA | NA | NA | 2 | 39.6 | | 7 | 0 | | |
| **Borghetti, 2016 (Italy)** | Positive surgical margins, neadjuvant treatment, PORT | N1 | 18 | NA | NA | NA | NA | 184 | NA | NA | NA | NA | 1 | 39 | | 7 | 14  ( Age, gender, histology, grading, pT, TNM Stage, VP invasion, surgical procedure, LAD, adjuvant CT, LN station, positive LN, examined LN, LNR) | | |
| **Feigenberg, 2007 (USA)** | T4 disease | NS | 9 | NA | NA | NA | NA | 31 | NA | NA | NA | NA | 1 | 37 | | 6 | 0 | | |
| **Ishida, 1990 (Japan)** | Exploratory thoracotomy | MLN | 62 | NA | NA | NA | NA | 46 | NA | NA | NA | NA | 3 | >60 | | 7 | 0 | | |
| **Larsson, 1976 (Sweden)** | Intraoperative deaths | MLN | 48 | NA | NA | NA | NA | 24 | NA | NA | NA | NA | 1 | >60 | | 5 | 0 | | |
| **Lee, 2007 (China)** | NA | NS | 126 | 38.9% | NA | IIA: 4.0%, IIB: 22.2%, IIIA: 73.8% | SCC 29.4%, ADK 61.1%, ADS 9.5% | 73 | 24.7% | NA | IIA: 12.3%, IIB: 45.2%, IIIA: 42.5% | SCC 47.9%, ADK 52.1%, ADS 0% | 1 | >60 | | 7 | NA | | |
| **Liu, 2015 (China)** | Preoperative CRT | NS | 85 | 43.5% | <60: 62.4%,≥60: 37.6% | IIA: 11.8%, IIB: 17.6%, IIIA: 70.6% | SCC 23.5%, ADK 71.8%, NOS 4.7% | 303 | 40.6% | <60: 52.8%,≥60: 47.2% | IIA: 24.4%, IIB: 15.5%, IIIA: 59.4%, NA: 0.6% | SCC 36.0%, ADK 55.8%, NOS 8.2% | 4 | 39 | | 8 | 2  ( Pathologic stage, pN) | | |
| **Macis, 2000 (Italy)** | NA | MLN | 19 | NA | NA | NA | NA | 25 | NA | NA | NA | NA | 2 | 35 | | 6 | 0 | | |
| **Moretti, 2009 (Italy)** | Preoperative CRT, Other simultaneous tumor(s) | MLN | 14 | 40.6% | 61 (44-79) | NA | NA | 69 | 25.6% | 62 (44-77) | NA | NA | 1 | 64 | | 8 | 4  ( RT, CT, age, gender) | | |
| **Shin, 2013 (South Korea)** | Neo-adjuvant treatment | N1 | 65 | NA | NA | NA | NA | 240 | NA | NA | NA | NA | 1 | >60 | | 8 | 8  ( Gender, clinical stage, histology, tumor size, number of metastatic LN, involved LN stations, hilar node involvement, adjuvant treatment) | | |
| **Suemasu, 1982 (Japan)** | Non-curative resection | MLN | 20 | NA | NA | NA | NA | 17 | NA | NA | NA | NA | 3 | 60 | | 6 | 0 | | |
| **Vansteenkiste, 1997 (Belgium)** | Multiple metastasis, anaplastic carcinoma | MLN | 52 | NA | NA | NA | NA | 79 | NA | NA | NA | NA | 1 | 54.7 | | 6 | 0 | | |
| **Total**  **Studies**  **(means**  **and**  **percentages**  **are weighted**  **with n values***)* |  | **MLN: 7 studies; N1: 2 studies; NS: 4 studies** | **573** | **40.9%** | **61 (44-79)** | **Tumor stage:**  **IIA: 7.1%; IIB: 20.4%; IIIA: 72.5%** | **SCC: 27.0%; ADK: 65.4%; ADS: 5.7%; NOS: 1.9%** | **1136** | **35.7%** | **62 (44-77)** | **Tumor stage:**  **IIA: 22.2%; IIB: 21.4%; IIIA: 56.4%** | **SCC: 38.3%; ADK: 55.1%; ADS: 0%; NOS: 6.6%** | **ENE definition (1: 8 studies; 2: 2 studies; 3: 2 studies; 4: 1 study)** | **Median=60**  **(range:**  **35-64)**  **months** | | **Median=6 (range: 5-8)** | **Nine studies: no adjustment;**  **Four studies: median=6 adjustments** | | |

Abbreviations: NA: not applicable or not available or not assessed; NS: not specified; MLN: Mediastinal Lymph Nodes; N1: lymph node stations of the pathological Stage pN1; NSCLC: non-small cell lung cancer, SCC: squamous cell carcinoma; ADK: adenocarcinoma; ADS: adenosquamous carcinoma; NOS: not otherwise specified; PORT: postoperative radiotherapy, CRT: chemoradiotherapy, ENE: extra-nodal extension; TNM: tumor-node-metastasis staging system; pT: tumor stage in pathologic TNM; VP: visceral pleura; LAD: lymphadenectomy; pN: lymph node status in pathologic TNM; CT: chemotherapy; RT: radiotherapy; LN: lymph node; LNR: lymph node ratio.

Notes:

* A percentage larger than 99% of the patients included in this meta-analysis regards non small cell lung cancer only (only two studies, the two very old studies by Bergh et al., 1965, and by Larsson, 1976, that have been included to preserve a historical inspiration of this work, included a very small proportion also of patients with a histology consistent with a diagnosis of small cell lung cancer, but more specific data about that are not available).

** Methods of ENE assessment:

1. ENE is defined as the infiltration and extension of cancer cells beyond the nodal capsule into the perinodal tissue; in this category, also a general definition of ENE not otherwise specified has been included;

2. ENE is defined as metastatic cancer showing extending through the nodal capsule into the perinodal adipose tissue. Deposits of invasively growing cancer cells in the perinodal adipose tissue and tumor cells in a vein vessel were also considered as ENE.

3. ENE is defined as positive when the tumor cells clearly extended beyond the nodal capsule into perinodal tissue; invasion into the perinodal lymph vessels was defined as positive;

4. ENE is defined as invasive cancer showing at least penetration of the nodal capsule or extending through the nodal capsule into the perinodal adipose tissue. Deposits of invasively growing cancer cells without a recognizable lymph node were considered extracapsular lymph node involvement, unless these deposits were associated with peripheral and/or vessel involvement.

**Supplementary Table 2.** Newcastle-Ottawa Scale (NOS) Table: Methodological Quality Of Cohort Studies Included In The Meta-Analysis*

| **First author,**  **publication year** | **Representativeness**  **of the exposed cohort** | **Selection of the unexposed**  **cohort** | **Ascertainment**  **of exposure†** | **Outcome of interest**  **not present**  **at start of study††** | **Control for**  **important factor or additional factor†††** | **Assessment of outcome** | **Follow-up**  **long enough for outcomes**  **to occur††††** | **Adequacy of**  **follow-up**  **of cohorts** | **Total quality**  **scores** |
| --- | --- | --- | --- | --- | --- | --- | --- | --- | --- |
| **Bergh, 1965** | * | * | * | - | - | * | * | * | 6 |
| **Bollen, 1994** | * | * | * | - | * | * | * | * | 7 |
| **Borghetti, 2016** | * | * | - | * | * | * | * | * | 7 |
| **Feigenberg, 2007** | * | * | - | * | - | * | * | * | 6 |
| **Ishida, 1990** | * | * | * | - | * | * | * | * | 7 |
| **Larsson, 1976** | * | * | - | - | - | * | * | * | 5 |
| **Lee, 2007** | * | * | * | - | * | * | * | * | 7 |
| **Liu, 2015** | * | * | * | * | * | * | * | * | 8 |
| **Macis, 2000** | * | * | * | - | * | * | - | * | 6 |
| **Moretti, 2009** | * | * | - | * | ** | * | * | * | 8 |
| **Shin, 2013**  **Suemasu, 1982**  **Vansteenkiste, 1997** | *  *  * | *  *  * | -  *  - | *  -  - | **  *  * | *  *  * | *  *  * | *  *  * | 8  7  6 |

* A study could be awarded a maximum of one star for each item except for the item Control for important factor or additional factor. The definition/explanation of each column of the Newcastle-Ottawa Scale is available at <http://www.ohri.ca/programs/clinical_epidemiology/oxford.htm>.

† For this index, one star was given if in Method section ENE was clearly assessed with histologic exam and its definition clearly explained.

†† Being outcome of interest mortality, we took as outcome of interest for assessment of quality if the disease-specific survival or the recurrence rate (also metastases) was assessed.

††† A maximum of 2 stars could be awarded for this item. Studies that controlled their survival analyses for at least two confounders received one star, whereas studies that presented data about ENE considering or separately different nodal stations or at least one specific nodal station, an additional star.

**††††** A cohort study with a mean/median follow-up time ≥3 years (36 months) takes one star; if the mean follow-up is not clearly indicated or deducible: no star.
