# Supplementary material for: Extranodal extension of nodal metastases is a poor prognostic moderator in non-small cell lung cancer: a meta-analysis
Source: Springer Nature journal article supplement (doi:10.1007/s00428-018-2309-1), 2018-02-01
Supplement: MOESM2 [file 15432540]

**Supplementary Figure 1. PRISMA checklist for this meta-analysis.**

Records after duplicates removed
(n = 930)

Additional records identified through other sources
(n = 1)

Records identified through database searching
(n = 963)

## Identification

## Screening

Records excluded
(n = 896)

Records screened
(n = 930)

Full-text articles excluded, with reasons
(n = 21)

*Doubled cohort (n=2)*

*No survival data (n=6)*

*Reviews (n=2)*

*No control group (n=6)*

*No real ENE (5)*

## Eligibility

Full-text articles assessed for eligibility
(n = 34)

Studies included in quantitative synthesis (meta-analysis)
(n = 13)

## Included
